# Supplementary material for: Combined molnupiravir-nirmatrelvir treatment improves the inhibitory effect on SARS-CoV-2 in macaques
Source: PubMed Central journal article supplement (PMC9977490; doi:10.1172/jci.insight.166485), 2023-02-22
Supplement: jciinsight-8-166485-s130.pdf [file jciinsight-8-166485-s130.pdf]

1 **SUPPLEMENTARY MATERIALS**

2

3 **Title:** Combined Molnupiravir and Nirmatrelvir Treatment Improves the Inhibitory Effect on  
4 SARS-CoV-2 in Rhesus Macaques

5

6 **Authors:** Kyle Rosenke<sup>1</sup>, Matt C. Lewis<sup>1</sup>, Friederike Feldmann<sup>2</sup>, Eric Bohrsen<sup>3</sup>, Benjamin  
7 Schwarz<sup>3</sup>, Atsushi Okumura<sup>1</sup>, W. Forrest Bohler<sup>1</sup>, Julie Callison<sup>1</sup>, Carl Shaia<sup>2</sup>, Catharine M.  
8 Bosio<sup>3</sup>, Jamie Lovaglio<sup>2</sup>, Greg Saturday<sup>2</sup>, Michael A. Jarvis<sup>1,4,5</sup>, Heinz Feldmann<sup>1†</sup>

9

10 **Affiliation:** <sup>1</sup>Laboratory of Virology, <sup>2</sup>Rocky Mountain Veterinary Branch and <sup>3</sup>Laboratory of  
11 Bacteriology, Division of Intramural Research, National Institute of Allergy and Infectious  
12 Diseases, National Institutes of Health, Hamilton, MT, USA; <sup>4</sup>University of Plymouth,  
13 Plymouth, Devon, UK; <sup>5</sup>The Vaccine Group Ltd, Plymouth, Devon, UK

14

15 †**Corresponding author:** Heinz Feldmann, Rocky Mountain Laboratories, 903 S 4<sup>th</sup> Street,  
16 Hamilton, MT, US-59840; Tel: (406)-375-7410; Email: [feldmannh@niaid.nih.gov](mailto:feldmannh@niaid.nih.gov)

17

18 **One Sentence Summary:** Molnupiravir and nirmatrelvir treatment of SARS-CoV-2 is most  
19 effective in the rhesus macaque COVID-19 model when used in combination.

20

21 **Supplementary Table 1**

| Target       | MRM pair<br>(m/z) | DP<br>(V) | EP<br>(V) | CE<br>(V) | CXP<br>(V) |
|--------------|-------------------|-----------|-----------|-----------|------------|
| PF-07321332* | 500.0/110.0       | 75        | 10        | 30        | 7          |
| PF-07321332  | 500.0/69.0        | 180       | 5         | 80        | 30         |
| Ritonavir*   | 721.0/140.0       | 185       | 15        | 85        | 20         |
| Ritonavir    | 721.0/268.0       | 120       | 5         | 30        | 40         |

22 \*Used for quantification

23 **Supplementary Table 1:** MRM signals were identified and optimized for ritonavir and PF-

24 07321332 (nirmatrelvir) from standards.Key: MRM: multiple reaction monitoring; DP:

25 declustering potential; EP: entrance potential; CE: collision cell entrance potential; CXP:

26 collision cell exit potential

27

28

29

30

31

32

Figure S1

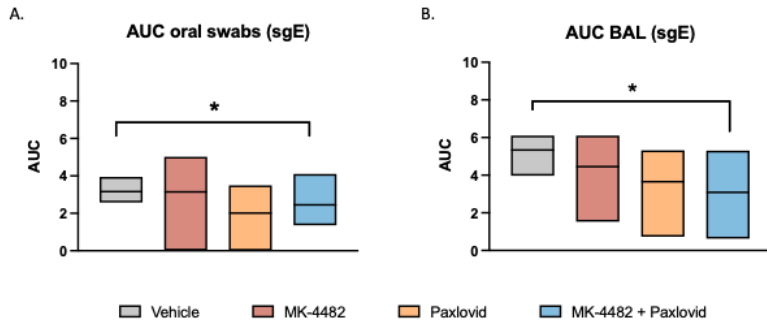

33

34 **Supplementary Figure 1. AUC analysis of oral swabs and BAL fluid.** Viral RNA loads from  
35 oral swabs (A) and BAL (B) samples were determined by quantitative RT-PCR targeting sgE  
36 RNA as a surrogate for replication and shedding. Copy numbers of viral genomes were  
37 calculated for each animal per day, AUC was then calculated over the course of the study and  
38 displayed in a boxplot with the mean displayed. Ordinary one-way ANOVA with multiple  
39 comparisons were used to evaluate significance (\*P-value = 0.01 to 0.05).

40

41

42

Figure S2

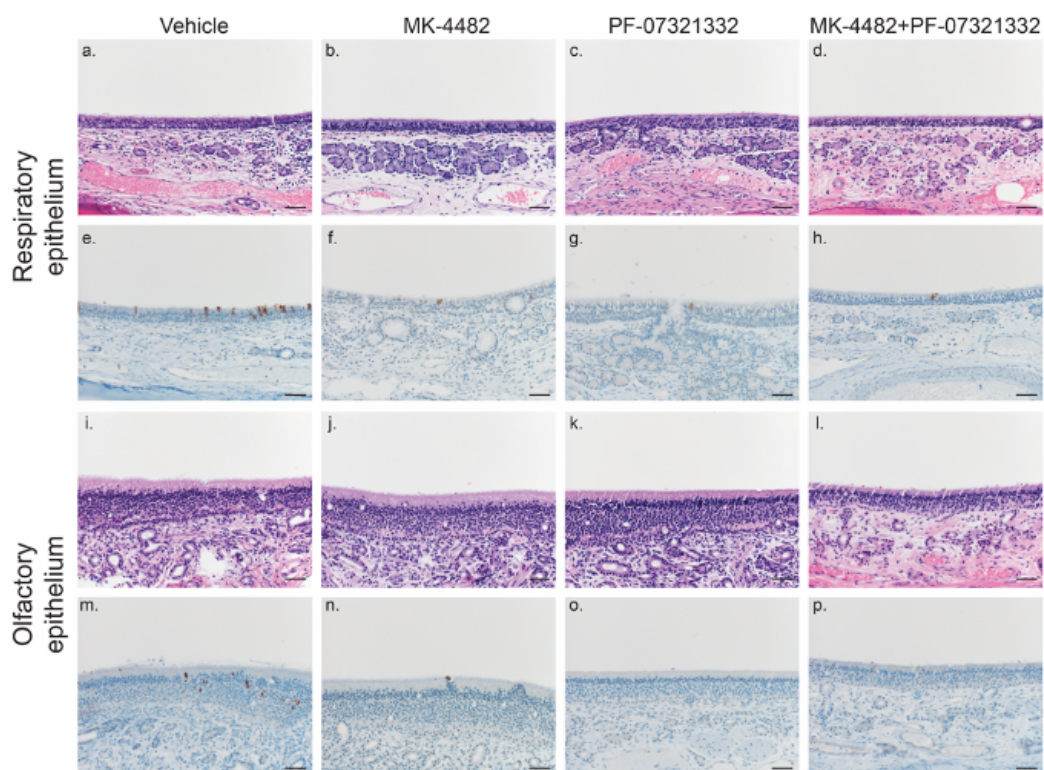

43

44 **Supplementary Figure 2. Combination therapy reduced antigen load in olfactory and**  
45 **respiratory epithelium from nasal turbinates.** Tissues were collected on 4dpi and stained with  
46 H&E or IHC for analysis. **H&E staining of representative tissues sections of the respiratory**  
47 **epithelium (A-D).** No pathology was found in H&E stains of the nasal turbinates. **IHC staining**  
48 **of SARS-CoV-2 antigen in respiratory epithelium (E-H).** Reduced or no IHC stain was found  
49 in the respiratory epithelium of MK-4482, PF-07321332 and MK-4482 + PF-07321332 treated  
50 animals compared to vehicle controls. **H&E staining of representative tissues sections of the**  
51 **olfactory epithelium from nasal turbinate (I-L).** No pathology was found in the olfactory  
52 epithelium. **IHC staining of SARS-CoV-2 antigen in olfactory epithelium (M-P).** IHC  
53 analysis did show scattered immunoreactivity in the vehicle treated animals and little to no

54 observable viral antigen in the MK-4482, PF-07321332 and MK-4482 + PF-07321332 treated  
55 animals 200X, Bar=50µm

56

57

58
